# Supplementary material for: Decoupling global biases and local interactions between cell biological variables
Source: eLife journal article supplement (doi:10.7554/elife.22323), 2017-03-13
Supplement: supp [file elife-22323-supp-v1.zip]

Archive with 4 entries (4 files):
- elife_poa_e22323_Video_1.avi
- elife_poa_e22323_Figure_2_figure_supplement_1.pdf
- elife_poa_e22323_Figure_3_figure_supplement_1.pdf
- elife_poa_e22323_Figure_6_figure_supplement_1.pdf
