# Supplementary figures and images for: Decoupling global biases and local interactions between cell biological variables
Source: eLife journal article supplement (doi:10.7554/elife.22323), 2017-03-13

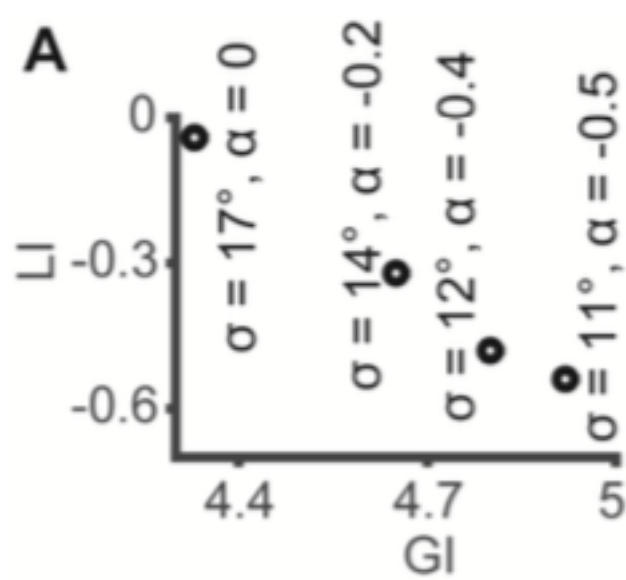

Figure 2-figure supplement 1

Supplement: supp [file elife-22323-supp-v1.zip › elife_poa_e22323_Figure_2_figure_supplement_1.pdf]

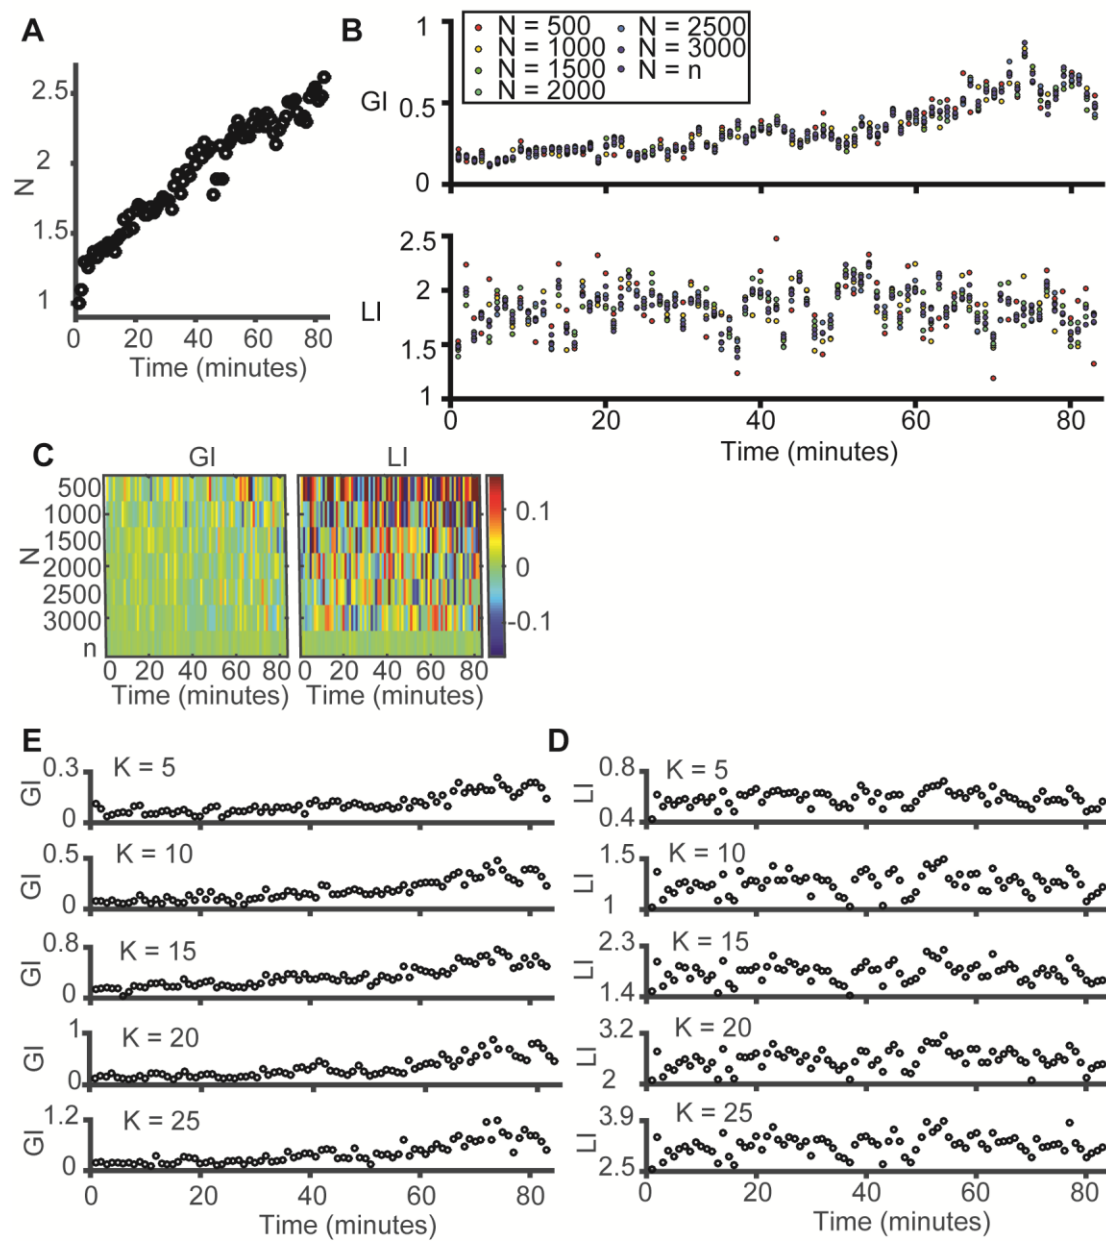

**Figure 3-figure supplement 1**

Supplement: supp [file elife-22323-supp-v1.zip › elife_poa_e22323_Figure_3_figure_supplement_1.pdf]

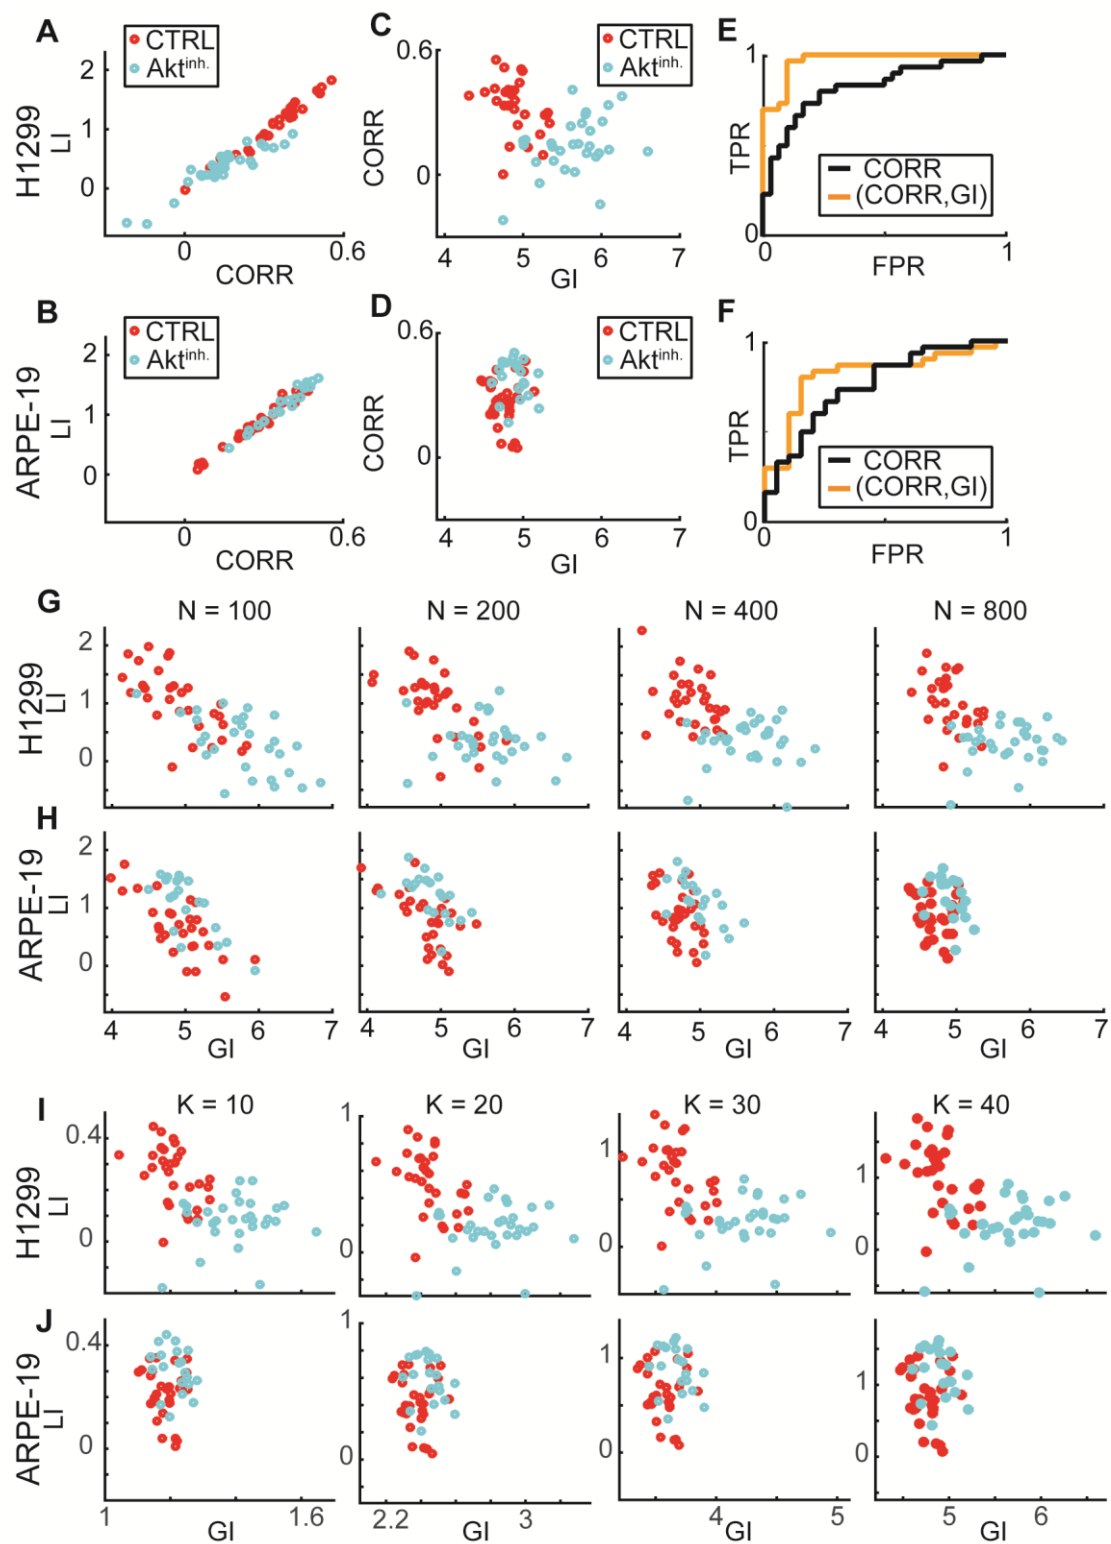

**Figure 6-figure supplement 1**

Supplement: supp [file elife-22323-supp-v1.zip › elife_poa_e22323_Figure_6_figure_supplement_1.pdf]
